# Supplementary material
Source: HighWire-hosted journal article supplement (https://bmjopenquality.bmj.com/highwire/filestream/136266/field_highwire_adjunct_files/1/ds4805.docx)
Supplement: ds4805.docx [file ds4805.docx]

|  | Pre-Changes | Post-Changes |
| --- | --- | --- |
| % using electronic system | 12% | 100% |
| subjective assessment of safety | 3.18 / 5 | 3.84/5 |
| felt sorting through jobs time consuming | 89% | 47% |
| handed over jobs for a different grade | 67% | 37% |
| aware who to hand weekend discharges to | 41% | 89% |
